# Supplementary material for: Manipulating Google’s Knowledge Graph Box to Counter Biased Information Processing During an Online Search on Vaccination: Application of a Technological Debiasing Strategy
Source: PubMed Central journal article supplement (PMC4911515; doi:10.2196/jmir.5430), 2016-06-02
Supplement: jmir_v18i6e137_app5.pdf [file jmir_v18i6e137_app5.pdf]

**Age**

| Experimental group | N          | Mean         | Std. Deviation | Std. Error  | 95% Confidence Interval for Mean |              | Minimum   | Maximum   |
|--------------------|------------|--------------|----------------|-------------|----------------------------------|--------------|-----------|-----------|
|                    |            |              |                |             | Lower Bound                      | Upper Bound  |           |           |
| Group 1            | 45         | 38.31        | 11.481         | 1.711       | 34.86                            | 41.76        | 19        | 64        |
| Group 2            | 45         | 39.02        | 10.382         | 1.548       | 35.90                            | 42.14        | 22        | 69        |
| Group 3            | 46         | 36.43        | 9.919          | 1.462       | 33.49                            | 39.38        | 20        | 57        |
| Group 4            | 50         | 37.30        | 10.403         | 1.471       | 34.34                            | 40.26        | 19        | 58        |
| Group 5            | 47         | 35.15        | 9.580          | 1.397       | 32.34                            | 37.96        | 22        | 61        |
| Group 6            | 46         | 37.91        | 12.229         | 1.803       | 34.28                            | 41.54        | 19        | 67        |
| <b>Total</b>       | <b>279</b> | <b>37.34</b> | <b>10.674</b>  | <b>.639</b> | <b>36.08</b>                     | <b>38.59</b> | <b>19</b> | <b>69</b> |

**ANOVA**

**Age**

|                | Sum of Squares   | df         | Mean Square | F    | Sig. |
|----------------|------------------|------------|-------------|------|------|
| Between Groups | 448.294          | 5          | 89.659      | .784 | .562 |
| Within Groups  | 31224.036        | 273        | 114.374     |      |      |
| <b>Total</b>   | <b>31672.330</b> | <b>278</b> |             |      |      |

|             |                |                | Experimental group |         |         |         |         |         | Total |
|-------------|----------------|----------------|--------------------|---------|---------|---------|---------|---------|-------|
|             |                |                | Group 1            | Group 2 | Group 3 | Group 4 | Group 5 | Group 6 |       |
| Nationality | United States  | Count          | 20                 | 17      | 26      | 21      | 16      | 21      | 121   |
|             |                | Expected Count | 19.5               | 19.5    | 19.9    | 21.7    | 20.4    | 19.9    | 121.0 |
|             | United Kingdom | Count          | 14                 | 16      | 10      | 16      | 14      | 12      | 82    |
|             |                | Expected Count | 13.2               | 13.2    | 13.5    | 14.7    | 13.8    | 13.5    | 82.0  |
|             | Canada         | Count          | 9                  | 9       | 5       | 7       | 14      | 8       | 52    |
|             |                | Expected Count | 8.4                | 8.4     | 8.6     | 9.3     | 8.8     | 8.6     | 52.0  |
|             | Australia      | Count          | 0                  | 1       | 0       | 2       | 1       | 1       | 5     |
|             |                | Expected Count | .8                 | .8      | .8      | .9      | .8      | .8      | 5.0   |
|             | New Zealand    | Count          | 0                  | 1       | 2       | 0       | 0       | 0       | 3     |
|             |                | Expected Count | .5                 | .5      | .5      | .5      | .5      | .5      | 3.0   |
|             | Other          | Count          | 2                  | 1       | 3       | 4       | 2       | 4       | 16    |
|             |                | Expected Count | 2.6                | 2.6     | 2.6     | 2.9     | 2.7     | 2.6     | 16.0  |
|             | Total          | Count          | 45                 | 45      | 46      | 50      | 47      | 46      | 279   |
|             |                | Expected Count | 45.0               | 45.0    | 46.0    | 50.0    | 47.0    | 46.0    | 279.0 |

| Chi-Square Tests             |                     |    |                       |                            |                         |             |  |
|------------------------------|---------------------|----|-----------------------|----------------------------|-------------------------|-------------|--|
|                              | Value               | df | Asymp. Sig. (2-sided) | Monte Carlo Sig. (2-sided) |                         |             |  |
|                              |                     |    |                       | Sig.                       | 99% Confidence Interval |             |  |
|                              |                     |    |                       |                            | Lower Bound             | Upper Bound |  |
| Pearson Chi-Square           | 23.089 <sup>a</sup> | 25 | .572                  | .590 <sup>b</sup>          | .578                    | .603        |  |
| Likelihood Ratio             | 24.238              | 25 | .506                  | .664 <sup>b</sup>          | .652                    | .676        |  |
| Fisher's Exact Test          | 20.209              |    |                       | .657 <sup>b</sup>          | .644                    | .669        |  |
| Linear-by-Linear Association | .083 <sup>c</sup>   | 1  | .774                  | .770 <sup>b</sup>          | .760                    | .781        |  |
| N of Valid Cases             | 279                 |    |                       |                            |                         |             |  |

a. 18 cells (50.0%) have expected count less than 5. The minimum expected count is .48.

b. Based on 10000 sampled tables with starting seed 2000000.

c. The standardized statistic is .287.

|                 |                                                       |                | Experimental group |         |         |         |         |         | Total |
|-----------------|-------------------------------------------------------|----------------|--------------------|---------|---------|---------|---------|---------|-------|
|                 |                                                       |                | Group 1            | Group 2 | Group 3 | Group 4 | Group 5 | Group 6 |       |
| Education level | College graduate or postgraduate studies              | Count          | 27                 | 21      | 17      | 29      | 23      | 28      | 145   |
|                 |                                                       | Expected Count | 23.4               | 23.4    | 23.9    | 26.0    | 24.4    | 23.9    | 145.0 |
|                 | Some college level                                    | Count          | 11                 | 9       | 11      | 10      | 12      | 9       | 62    |
|                 |                                                       | Expected Count | 10.0               | 10.0    | 10.2    | 11.1    | 10.4    | 10.2    | 62.0  |
|                 | Post high school vocational or technical training     | Count          | 0                  | 3       | 5       | 2       | 5       | 1       | 16    |
|                 |                                                       | Expected Count | 2.6                | 2.6     | 2.6     | 2.9     | 2.7     | 2.6     | 16.0  |
|                 | Between 8 to 12 years or completed high school degree | Count          | 7                  | 12      | 13      | 9       | 7       | 8       | 56    |
|                 |                                                       | Expected Count | 9.0                | 9.0     | 9.2     | 10.0    | 9.4     | 9.2     | 56.0  |
| Total           |                                                       | Count          | 45                 | 45      | 46      | 50      | 47      | 46      | 279   |
|                 |                                                       | Expected Count | 45.0               | 45.0    | 46.0    | 50.0    | 47.0    | 46.0    | 279.0 |

| Chi-Square Tests             |                     |    |                       |                            |                         |             |  |
|------------------------------|---------------------|----|-----------------------|----------------------------|-------------------------|-------------|--|
|                              | Value               | df | Asymp. Sig. (2-sided) | Monte Carlo Sig. (2-sided) |                         |             |  |
|                              |                     |    |                       | Sig.                       | 99% Confidence Interval |             |  |
|                              |                     |    |                       |                            | Lower Bound             | Upper Bound |  |
| Pearson Chi-Square           | 16.562 <sup>a</sup> | 15 | .346                  | .348 <sup>b</sup>          | .336                    | .361        |  |
| Likelihood Ratio             | 18.648              | 15 | .230                  | .283 <sup>b</sup>          | .272                    | .295        |  |
| Fisher's Exact Test          | 16.215              |    |                       | .345 <sup>b</sup>          | .332                    | .357        |  |
| Linear-by-Linear Association | .401 <sup>c</sup>   | 1  | .527                  | .529 <sup>b</sup>          | .516                    | .542        |  |
| N of Valid Cases             | 279                 |    |                       |                            |                         |             |  |

a. 6 cells (25.0%) have expected count less than 5. The minimum expected count is 2.58.

b. Based on 10000 sampled tables with starting seed 92208573.

c. The standardized statistic is -.633.

|                                                                                               |     | Experimental group |         |         |         |         |         | Total |       |
|-----------------------------------------------------------------------------------------------|-----|--------------------|---------|---------|---------|---------|---------|-------|-------|
|                                                                                               |     | Group 1            | Group 2 | Group 3 | Group 4 | Group 5 | Group 6 |       |       |
| Have you ever had training for a job in the medical field or worked in a medical environment? | Yes | Count              | 7       | 2       | 4       | 5       | 4       | 6     | 28    |
|                                                                                               |     | Expected Count     | 4.5     | 4.5     | 4.6     | 5.0     | 4.7     | 4.6   | 28.0  |
|                                                                                               | No  | Count              | 38      | 43      | 42      | 45      | 43      | 40    | 251   |
|                                                                                               |     | Expected Count     | 40.5    | 40.5    | 41.4    | 45.0    | 42.3    | 41.4  | 251.0 |
| Total                                                                                         |     | Count              | 45      | 45      | 46      | 50      | 47      | 46    | 279   |
|                                                                                               |     | Expected Count     | 45.0    | 45.0    | 46.0    | 50.0    | 47.0    | 46.0  | 279.0 |

| Chi-Square Tests             |                    |    |                       |                            |                         |             |  |
|------------------------------|--------------------|----|-----------------------|----------------------------|-------------------------|-------------|--|
|                              | Value              | df | Asymp. Sig. (2-sided) | Monte Carlo Sig. (2-sided) |                         |             |  |
|                              |                    |    |                       | Sig.                       | 99% Confidence Interval |             |  |
|                              |                    |    |                       |                            | Lower Bound             | Upper Bound |  |
| Pearson Chi-Square           | 3.750 <sup>a</sup> | 5  | .586                  | .604 <sup>b</sup>          | .592                    | .617        |  |
| Likelihood Ratio             | 3.899              | 5  | .564                  | .601 <sup>b</sup>          | .588                    | .613        |  |
| Fisher's Exact Test          | 3.715              |    |                       | .602 <sup>b</sup>          | .589                    | .614        |  |
| Linear-by-Linear Association | .001 <sup>c</sup>  | 1  | .977                  | 1.000 <sup>b</sup>         | 1.000                   | 1.000       |  |
| N of Valid Cases             | 279                |    |                       |                            |                         |             |  |

a. 5 cells (41.7%) have expected count less than 5. The minimum expected count is 4.52.

b. Based on 10000 sampled tables with starting seed 1993510611.

c. The standardized statistic is -.029.

In general, how confident are you that you could get health-related advice or information from online sources if you need it? [Scale from 1=Not confident at all to 5=Completely confident]

|         | N   | Mean | Std. Deviation | Std. Error | 95% Confidence Interval for Mean |             | Minimum | Maximum |
|---------|-----|------|----------------|------------|----------------------------------|-------------|---------|---------|
|         |     |      |                |            | Lower Bound                      | Upper Bound |         |         |
| Group 1 | 45  | 3.58 | 1.011          | .151       | 3.27                             | 3.88        | 1       | 5       |
| Group 2 | 45  | 3.78 | 1.064          | .159       | 3.46                             | 4.10        | 2       | 5       |
| Group 3 | 46  | 3.63 | .974           | .144       | 3.34                             | 3.92        | 1       | 5       |
| Group 4 | 50  | 3.78 | 1.075          | .152       | 3.47                             | 4.09        | 2       | 5       |
| Group 5 | 47  | 3.57 | .927           | .135       | 3.30                             | 3.85        | 2       | 5       |
| Group 6 | 46  | 3.70 | 1.008          | .149       | 3.40                             | 4.00        | 1       | 5       |
| Total   | 279 | 3.67 | 1.006          | .060       | 3.56                             | 3.79        | 1       | 5       |

| Chi-Square Tests             |                    |    |                       |                            |                         |             |  |
|------------------------------|--------------------|----|-----------------------|----------------------------|-------------------------|-------------|--|
|                              | Value              | df | Asymp. Sig. (2-sided) | Monte Carlo Sig. (2-sided) |                         |             |  |
|                              |                    |    |                       | Sig.                       | 99% Confidence Interval |             |  |
|                              |                    |    |                       |                            | Lower Bound             | Upper Bound |  |
| Pearson Chi-Square           | 3.048 <sup>a</sup> | 5  | .693                  | .698 <sup>b</sup>          | .686                    | .710        |  |
| Likelihood Ratio             | 3.074              | 5  | .689                  | .707 <sup>b</sup>          | .696                    | .719        |  |
| Fisher's Exact Test          | 3.029              |    |                       | .700 <sup>b</sup>          | .688                    | .712        |  |
| Linear-by-Linear Association | .602 <sup>c</sup>  | 1  | .438                  | .463 <sup>b</sup>          | .451                    | .476        |  |
| N of Valid Cases             | 279                |    |                       |                            |                         |             |  |

a. 4 cells (33.3%) have expected count less than 5. The minimum expected count is 4.84.

b. Based on 10000 sampled tables with starting seed 79654295.

c. The standardized statistic is .776.

#### ANOVA

|                | Sum of Squares | df  | Mean Square | F    | Sig. |
|----------------|----------------|-----|-------------|------|------|
| Between Groups | 2.038          | 5   | .408        | .398 | .850 |
| Within Groups  | 279.281        | 273 | 1.023       |      |      |
| Total          | 281.319        | 278 |             |      |      |
