# Supplementary material for: Manipulating Google’s Knowledge Graph Box to Counter Biased Information Processing During an Online Search on Vaccination: Application of a Technological Debiasing Strategy
Source: PubMed Central journal article supplement (PMC4911515; doi:10.2196/jmir.5430), 2016-06-02
Supplement: jmir_v18i6e137_app6.pdf [file jmir_v18i6e137_app6.pdf]

The following heat maps were generated using all registered cursor movements for each group during the whole experiment.

The image shows a Google search results page for the query "Vaccination". The search bar at the top contains the text "Please search using this box" and a search icon. Below the search bar, there are navigation links for "Web", "Images", "Videos", "News", "Books", and "More". A timer indicates "0 Minutes 0 Seconds". The search results are listed on the left, with the first result titled "Vaccination" highlighted. The description for this result reads: "Immunization is the process whereby a person is made immune or resistant to an infectious disease, typically by the administration of a vaccine. Vaccines stimulate the body's own immune system to protect the person against subsequent infection or disease. World Health Organization. See also: Myths and facts about vaccination". A heatmap overlay is visible on the page, showing a high concentration of cursor movements (indicated by red and yellow colors) on the "Vaccination" search result, and lower concentrations (indicated by blue colors) on other search results. The heatmap also shows some activity on the navigation links and the search bar. At the bottom of the page, there is a "Go" button with a "Next" link, and a footer with links for "Help", "Send feedback", and "Privacy & Terms".

Comprehensible basic information [WHO], Group 1

Google Please search using this box +You 🔔 👤

[Web](#) [Images](#) [Videos](#) [News](#) [Books](#) [More](#) [Search tools](#) 👤 🌐 ⚙️

0 Minutes 0 Seconds

**Search result title - 1**  
search result url - 1  
Search result description - 1

**Search result title - 2**  
search result url - 2  
Search result description - 2

**Search result title - 3**  
search result url - 3  
Search result description - 3

**Search result title - 4**  
search result url - 4  
Search result description - 4

**Search result title - 5**  
search result url - 5  
Search result description 5

**Search result title - 6**  
search result url - 6  
Search result description - 6

**Search result title - 7**  
search result url - 7  
Search result description - 7

**Search result title - 8**  
search result url - 8  
Search result description - 8

**Search result title - 9**  
search result url - 9  
Search result description - 9

**Search result title - 10**  
search result url - 10  
Search result description - 10

## Vaccination

Field of study

Vaccination is the administration of antigenic material to stimulate an individual's immune system to develop adaptive immunity to a pathogen. Vaccines can prevent or ameliorate morbidity from infection. [Wikipedia](#)

**Go**oooooooooogle >  
1 2 3 4 5 6 7 8 9 10 Next

● Unknown - Use precise location - Learn more  
[Help](#) [Send feedback](#) [Privacy & Terms](#)

**Hardly comprehensible basic information [Wikipedia], Group 2**

Google Please search using this box +You 🔔 👤

[Web](#) [Images](#) [Videos](#) [News](#) [Books](#) [More](#) [Search tools](#) 👤 🌐 ⚙️

0 Minutes 0 Seconds

Search result title - 1  
search result url - 1  
Search result description - 1

Search result title - 2  
search result url - 2  
Search result description - 2

Search result title - 3  
search result url - 3  
Search result description - 3

Search result title - 4  
search result url - 4  
Search result description - 4

Search result title - 5  
search result url - 5  
Search result description 5

Search result title - 6  
search result url - 6  
Search result description - 6

Search result title - 7  
search result url - 7  
Search result description - 7

Search result title - 8  
search result url - 8  
Search result description - 8

Search result title - 9  
search result url - 9  
Search result description - 9

Search result title - 10  
search result url - 10  
Search result description - 10

### Vaccination

Field of study

Please be aware that you may encounter false or misleading information on this topic during your online search.

Gooooooooooogle >  
1 2 3 4 5 6 7 8 9 10 Next

● Unknown - Use precise location - Learn more  
[Help](#) [Send feedback](#) [Privacy & Terms](#)

## Warning present, Group 3

Google Please search using this box +You 🔔 👤

**Web** Images Videos News Books More Search tools 👤 🌐 ⚙️

0 Minutes 0 Seconds

Search result title - 1  
search result url - 1  
Search result description - 1

Search result title - 2  
search result url - 2  
Search result description - 2

Search result title - 3  
search result url - 3  
Search result description - 3

Search result title - 4  
search result url - 4  
Search result description - 4

Search result title - 5  
search result url - 5  
Search result description 5

Search result title - 6  
search result url - 6  
Search result description - 6

Search result title - 7  
search result url - 7  
Search result description - 7

Search result title - 8  
search result url - 8  
Search result description - 8

Search result title - 9  
search result url - 9  
Search result description - 9

Search result title - 10  
search result url - 10  
Search result description - 10

### Vaccination

Field of study

Immunization is the process whereby a person is made immune or resistant to an infectious disease, typically by the administration of a vaccine. Vaccines stimulate the body's own immune system to protect the person against subsequent infection or disease.  
World Health Organization  
See also: Myths and facts about vaccination

Please be aware that you may encounter false or misleading information on this topic during your online search.

Gooooooooooogle >  
1 2 3 4 5 6 7 8 9 10 Next

● Unknown - Use precise location - Learn more  
Help Send feedback Privacy & Terms

**Comprehensible basic information [WHO] plus warning present, Group 4**

Google Please search using this box [Search] +You [Grid] [Bell] [Profile]

Web Images Videos News Books More Search tools [User] [Globe] [Settings]

0 Minutes 0 Seconds

Search result title - 1  
search result url - 1  
Search result description - 1

Search result title - 2  
search result url - 2  
Search result description - 2

Search result title - 3  
search result url - 3  
Search result description - 3

Search result title - 4  
search result url - 4  
Search result description - 4

Search result title - 5  
search result url - 5  
Search result description 5

Search result title - 6  
search result url - 6  
Search result description - 6

Search result title - 7  
search result url - 7  
Search result description - 7

Search result title - 8  
search result url - 8  
Search result description - 8

Search result title - 9  
search result url - 9  
Search result description - 9

Search result title - 10  
search result url - 10  
Search result description - 10

### Vaccination

Field of study

Vaccination is the administration of antigenic material to stimulate an individual's immune system to develop adaptive immunity to a pathogen. Vaccines can prevent or ameliorate morbidity from infection. Wikipedia

Please be aware that you may encounter false or misleading information on this topic during your online search.

Go ooooooogole >  
1 2 3 4 5 6 7 8 9 10 Next

Unknown - Use precise location - Learn more  
Help Send feedback Privacy & Terms

**Hardly comprehensible basic information [Wikipedia] plus warning present, Group 5**

Google Please search using this box +You 🔔 👤

[Web](#) [Images](#) [Videos](#) [News](#) [Books](#) [More](#) [Search tools](#) 👤 🌐 ⚙️

0 0  
Minutes Seconds

Search result title - 1  
search result url - 1  
Search result description - 1

Search result title - 2  
search result url - 2  
Search result description - 2

Search result title - 3  
search result url - 3  
Search result description - 3

Search result title - 4  
search result url - 4  
Search result description - 4

Search result title - 5  
search result url - 5  
Search result description 5

Search result title - 6  
search result url - 6  
Search result description - 6

Search result title - 7  
search result url - 7  
Search result description - 7

Search result title - 8  
search result url - 8  
Search result description - 8

Search result title - 9  
search result url - 9  
Search result description - 9

Search result title - 10  
search result url - 10  
Search result description - 10

Gooooooooooogle >  
1 2 3 4 5 6 7 8 9 10 Next

● Unknown - Use precise location - Learn more  
[Help](#) [Send feedback](#) [Privacy & Terms](#)

## Control group, Group 6
